# Supplementary material for: Factors associated with stillbirth in women with diabetes
Source: Springer Nature journal article supplement (doi:10.1007/s00125-019-4943-9), 2019-07-28

**ESM Table 1: Maternal and infant demographics according to availability of HbA<sub>1c</sub> measurement pre-pregnancy and in each trimester**

|                                             | Prepregnancy                         |                                         |                                     |                                        | 2 <sup>nd</sup> trimester            |                                         |                                     |                                        | 3 <sup>rd</sup> trimester            |                                         |                                     |                                        |
|---------------------------------------------|--------------------------------------|-----------------------------------------|-------------------------------------|----------------------------------------|--------------------------------------|-----------------------------------------|-------------------------------------|----------------------------------------|--------------------------------------|-----------------------------------------|-------------------------------------|----------------------------------------|
|                                             | Type 1 diabetes                      |                                         | Type 2 diabetes                     |                                        | Type 1 diabetes                      |                                         | Type 2 diabetes                     |                                        | Type 1 diabetes                      |                                         | Type 2 diabetes                     |                                        |
|                                             | HbA <sub>1c</sub> available (n=2351) | No HbA <sub>1c</sub> available (n=1427) | HbA <sub>1c</sub> available (n=813) | No HbA <sub>1c</sub> available (n=801) | HbA <sub>1c</sub> available (n=2100) | No HbA <sub>1c</sub> available (n=1678) | HbA <sub>1c</sub> available (n=771) | No HbA <sub>1c</sub> available (n=843) | HbA <sub>1c</sub> available (n=1971) | No HbA <sub>1c</sub> available (n=1807) | HbA <sub>1c</sub> available (n=797) | No HbA <sub>1c</sub> available (n=817) |
| <b>Maternal age at delivery, years (SD)</b> | 30.1 (5.7)                           | 29.1 (5.7)***                           | 33.8 (5.5)                          | 32.6 (5.6)***                          | 29.8 (5.7)                           | 29.7 (5.6)                              | 33.4 (5.5)                          | 33.0 (5.7)                             | 29.8 (5.6)                           | 29.7 (5.7)                              | 33.5 (5.5)                          | 32.9 (5.7)                             |
| <b>SIMD score (SD)</b>                      | 22.6 (16.7)                          | 25.0 (17.6)***                          | 28.5 (18.0)                         | 27.5 (18.3)                            | 22.6 (16.0)                          | 24.6 (18.2)***                          | 27.8 (18.0)                         | 28.1 (18.3)                            | 22.6 (16.1)                          | 24.6 (18.0)***                          | 27.7 (17.4)                         | 28.3 (18.8)                            |
| <b>Duration of diabetes, years (SD)</b>     | 14.7 (8.4)                           | 13.0 (8.4)***                           | 4.8 (4.0)                           | 3.6 (4.1)***                           | 14.7 (8.4)                           | 13.2 (8.4)***                           | 4.5 (4.0)                           | 3.9 (4.2)**                            | 14.6 (8.5)                           | 13.5 (8.3)***                           | 4.4 (4.0)                           | 4.0 (4.2)                              |
| <b>Nulliparous</b>                          | 50.5% (n=1176)                       | 49.3% (n=695)                           | 30.8% (n=248)                       | 31.2% (n=248)                          | 50.9% (n=1057)                       | 49.0% (n=814)                           | 30.7% (n=235)                       | 31.2% (n=261)                          | 50.8% (n=986)                        | 49.3% (n=885)                           | 31.2% (n=248)                       | 30.7% (n=248)                          |
| <b>Maternal Smoking</b>                     | 17.0% (n=369)                        | 26.1% (n=344)***                        | 19.2% (n=143)                       | 23.2% (n=172)                          | 20.1% (n=398)                        | 21.0% (n=315)                           | 19.5% (n=140)                       | 22.8% (n=175)                          | 19.7% (n=366)                        | 21.4% (n=347)                           | 20.6% (n=152)                       | 21.8% (n=163)                          |
| <b>Prepregnancy maternal BMI (SD)</b>       | 26.3 (4.7)                           | 26.4 (5.5)                              | 33.8 (7.1)                          | 34.6 (7.1)                             | 26.3 (5.0)                           | 26.2 (4.7)                              | 34.1 (7.1)                          | 34.0 (7.2)                             | 26.3 (5.0)                           | 26.2 (4.7)                              | 34.2 (7.3)                          | 33.8 (6.9)                             |
| <b>Stillbirth rate</b>                      | 16.2 (n=38)                          | 16.1 (n=23)                             | 20.9 (n=17)                         | 25.0 (n=20)                            | 13.3 (n=28)                          | 19.7 (n=33)                             | 19.5 (n=15)                         | 26.1 (n=22)                            | 13.7 (n=27)                          | 18.8 (n=34)                             | 13.8 (n=11)                         | 31.8 (n=26)*                           |
| <b>Male fetus</b>                           | 49.8% (n=1170)                       | 48.9% (n=698)                           | 51.2% (n=416)                       | 51.3% (n=411)                          | 49.6% (n=1042)                       | 49.2% (n=826)                           | 49.9% (n=385)                       | 52.4% (n=442)                          | 49.1% (n=967)                        | 49.9% (n=901)                           | 51.8% (n=413)                       | 50.7% (n=414)                          |
| <b>Gestational age delivery, weeks (SD)</b> | 36.6 (2.2)                           | 36.6 (2.3)                              | 36.9 (2.4)                          | 37.3 (2.3)***                          | 36.5 (2.1)                           | 36.6 (2.4)                              | 36.9 (2.4)                          | 37.3 (2.4)***                          | 36.8 (1.8)                           | 36.3 (2.6)***                           | 37.2 (1.8)                          | 36.9 (2.9)**                           |
| <b>Birth weight Z-score (SD)</b>            | 1.43 (1.30)                          | 1.28 (1.31)***                          | 0.94 (1.41)                         | 0.74 (1.32)**                          | 1.38 (1.32)                          | 1.36 (1.29)                             | 0.94 (1.40)                         | 0.75 (1.33)**                          | 1.42 (1.28)                          | 1.32 (1.33) *                           | 0.91 (1.41)                         | 0.77 (1.32)*                           |

Values are presented as % of group, or mean ± SD, \*p<0.05, \*\*p<0.01, \*\*\*p<0.001 for stillbirth versus livebirth by,  $\chi^2$  or t-test

Scottish Index of Multiple Deprivation (SIMD) 2012 score is indicator of average material deprivation in area of residence at time of delivery. Scores range 0.89-89.89, with higher numbers reflecting residence in an area of higher material deprivation.

**ESM Table 2: Stillbirth prevalence according to birth weight centile and diabetes diagnosis**

|                                                        | Birth weight centile              |                                                    |                                     |                                     |
|--------------------------------------------------------|-----------------------------------|----------------------------------------------------|-------------------------------------|-------------------------------------|
| <b>Type 1 diabetes (n=3728)</b>                        | <b>&lt;10<sup>th</sup> (n=72)</b> | <b>10<sup>th</sup> to 90<sup>th</sup> (n=1705)</b> | <b>&gt;90<sup>th</sup> (n=1951)</b> | <b>&gt;95<sup>th</sup> (n=1527)</b> |
| % stillbirth (n)                                       | 6.9% (5)                          | 1.2% (20)                                          | 1.7% (34)                           | 1.7% (26)                           |
| % livebirth (n)                                        | 93.1% (67)                        | 98.8% (1685)                                       | 98.3% (1917)                        | 98.3% (1501)                        |
| <b>Odds Ratio stillbirth (95% confidence interval)</b> | 6.3 (2.3-17.3)                    | Ref                                                | 1.5 (0.9-2.6)                       | 1.5 (0.8-2.6)                       |
| <hr/>                                                  |                                   |                                                    |                                     |                                     |
| <b>Type 2 diabetes (n=1600)</b>                        | <b>&lt;10<sup>th</sup> (n=82)</b> | <b>10<sup>th</sup> to 90<sup>th</sup> (n=948)</b>  | <b>&gt;90<sup>th</sup> (n=570)</b>  | <b>&gt;95<sup>th</sup> (n=417)</b>  |
| % stillbirth (n)                                       | 4.9% (4)                          | 1.7% (16)                                          | 2.8% (16)                           | 3.55% (15)                          |
| % livebirth (n)                                        | 95.1% (78)                        | 98.3% (932)                                        | 97.2% (554)                         | 96.45 (402)                         |
| <b>Odds Ratio stillbirth (95% confidence interval)</b> | 3.0 (1.0-9.2)                     | Ref                                                | 1.7 (0.8-3.4)                       | 2.2 (1.1-4.4)                       |

Missing values (n): 50 in type 1, 14 in type 2

**ESM Table 3: Mean birth weight Z-score according to combined pre-pregnancy and 3<sup>rd</sup> trimester HbA1c**

|                                                          | Type 1 diabetes                                                      |                                                                      |                                                                      |                                                                      | Type 2 diabetes                                                      |                                                                      |                                                                      |                                                                      |
|----------------------------------------------------------|----------------------------------------------------------------------|----------------------------------------------------------------------|----------------------------------------------------------------------|----------------------------------------------------------------------|----------------------------------------------------------------------|----------------------------------------------------------------------|----------------------------------------------------------------------|----------------------------------------------------------------------|
|                                                          | 3 <sup>rd</sup> trimester HbA <sub>1c</sub> 1 <sup>st</sup> quartile | 3 <sup>rd</sup> trimester HbA <sub>1c</sub> 2 <sup>nd</sup> quartile | 3 <sup>rd</sup> trimester HbA <sub>1c</sub> 3 <sup>rd</sup> quartile | 3 <sup>rd</sup> trimester HbA <sub>1c</sub> 4 <sup>th</sup> quartile | 3 <sup>rd</sup> trimester HbA <sub>1c</sub> 1 <sup>st</sup> quartile | 3 <sup>rd</sup> trimester HbA <sub>1c</sub> 2 <sup>nd</sup> quartile | 3 <sup>rd</sup> trimester HbA <sub>1c</sub> 3 <sup>rd</sup> quartile | 3 <sup>rd</sup> trimester HbA <sub>1c</sub> 4 <sup>th</sup> quartile |
| Pre-pregnancy HbA <sub>1c</sub> 1 <sup>st</sup> quartile | 0.90<br>(0.12)                                                       | 1.43<br>(0.14)                                                       | 1.62<br>(0.19)                                                       | 1.62<br>(0.30)                                                       | 0.39<br>(0.13)                                                       | 0.95<br>(0.17)                                                       | 1.55<br>(0.29)                                                       | 2.35<br>(0.43)                                                       |
| Pre-pregnancy HbA <sub>1c</sub> 2 <sup>nd</sup> quartile | 0.73<br>(0.17)                                                       | 1.32<br>(0.11)                                                       | 1.54<br>(0.11)                                                       | 1.70<br>(0.15)                                                       | 0.38<br>(0.28)                                                       | 0.74<br>(0.23)                                                       | 1.51<br>(0.27)                                                       | 1.93<br>(0.39)                                                       |
| Pre-pregnancy HbA <sub>1c</sub> 3 <sup>rd</sup> quartile | 0.96<br>(0.23)                                                       | 1.29<br>(0.14)                                                       | 1.61<br>(0.11)                                                       | 1.80<br>(0.12)                                                       | 0.69<br>(0.34)                                                       | 0.97<br>(0.32)                                                       | 1.84<br>(0.39)                                                       | 1.52<br>(0.36)                                                       |
| Pre-pregnancy HbA <sub>1c</sub> 4 <sup>th</sup> quartile | 0.64<br>(0.27)                                                       | 1.12<br>(0.19)                                                       | 1.40<br>(0.13)                                                       | 1.73<br>(0.09)                                                       | 0.88<br>(0.36)                                                       | 0.89<br>(0.31)                                                       | 1.11<br>(0.29)                                                       | 1.79<br>(0.26)                                                       |

Quartiles defined by combined HbA<sub>1c</sub> from type 1 and type 2 diabetes:

Pre-pregnancy quartile 1 <52 mmol/mol (6.9%); quartile 2 ≥52 mmol/mol (6.9%) and <63 mmol/mol (7.9%); quartile 3 ≥63 mmol/mol (7.9%) and <76 mmol/mol (9.1%); quartile 4 ≥ 76mmol/mol (9.1%)

3<sup>rd</sup> trimester quartile 1 <42 mmol/mol (6.0%); quartile 2 ≥42mmol/mol (6.0%) and < 49mmol/mol (6.6%); quartile 3 ≥49mmol/mol (6.6%) and <56 mmol/mol (7.3%); quartile 4 ≥ 56 mmol/mol (7.3%)

**ESM table 4: HbA<sub>1c</sub> value correlation at pre-pregnancy, 1<sup>st</sup>, 2<sup>nd</sup> and 3<sup>rd</sup> trimester in type 1 and type 2 diabetes**

|                                             | Type 1 diabetes                          |                                          |                                                      |                                                      | Type 2 diabetes                         |                                         |                                                     |                                                     |
|---------------------------------------------|------------------------------------------|------------------------------------------|------------------------------------------------------|------------------------------------------------------|-----------------------------------------|-----------------------------------------|-----------------------------------------------------|-----------------------------------------------------|
|                                             | Pre-pregnancy HbA <sub>1c</sub> (n=2351) | 1st trimester HbA <sub>1c</sub> (n=2251) | 2 <sup>nd</sup> trimester HbA <sub>1c</sub> (n=2100) | 3 <sup>rd</sup> trimester HbA <sub>1c</sub> (n=1971) | Pre-pregnancy HbA <sub>1c</sub> (n=813) | 1st trimester HbA <sub>1c</sub> (n=828) | 2 <sup>nd</sup> trimester HbA <sub>1c</sub> (n=771) | 3 <sup>rd</sup> trimester HbA <sub>1c</sub> (n=797) |
| Pre-pregnancy HbA <sub>1c</sub>             | 1.000                                    | 0.687 (n=1658)****                       | 0.493 (n=1512)****                                   | 0.466 (n=1382)****                                   | 1.000                                   | 0.733 (n=550)****                       | 0.503 (n=495)****                                   | 0.478 (n=476)****                                   |
| 1 <sup>st</sup> trimester HbA <sub>1c</sub> | 0.687 (n=1658)****                       | 1.000                                    | 0.658 (n=1670)****                                   | 0.586 (n=1527)****                                   | 0.733 (n=550)****                       | 1.000                                   | 0.604 (n=584)****                                   | 0.469 (n=551)****                                   |
| 2 <sup>nd</sup> trimester HbA <sub>1c</sub> | 0.493 (n=1512)****                       | 0.658 (n=1670)****                       | 1.000                                                | 0.747 (n=1626)****                                   | 0.503 (n=495)****                       | 0.604 (n=584)****                       | 1.000                                               | 0.746 (n=606)****                                   |
| 3 <sup>rd</sup> trimester HbA <sub>1c</sub> | 0.466 (n=1382)****                       | 0.586 (n=1527)****                       | 0.747 (n=1626)****                                   | 1.000                                                | 0.478 (n=476)****                       | 0.470 (n=551)****                       | 0.746 (n=606)****                                   | 1.000                                               |

\*\*\*\* p<0.0001

**ESM Figure 1: Birth weight Z-score and gestational age at delivery according to health board area of delivery (1A: gestational age at delivery type 1 diabetes, 1B: gestational age at delivery type 2 diabetes; 1C: birth weight type 1 diabetes, 1D: birth weight type 2 diabetes).**

Dots show mean value; error bars show standard deviation.

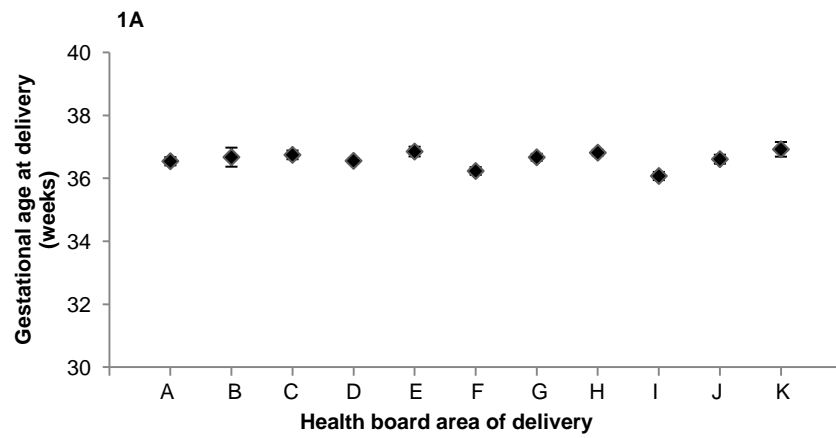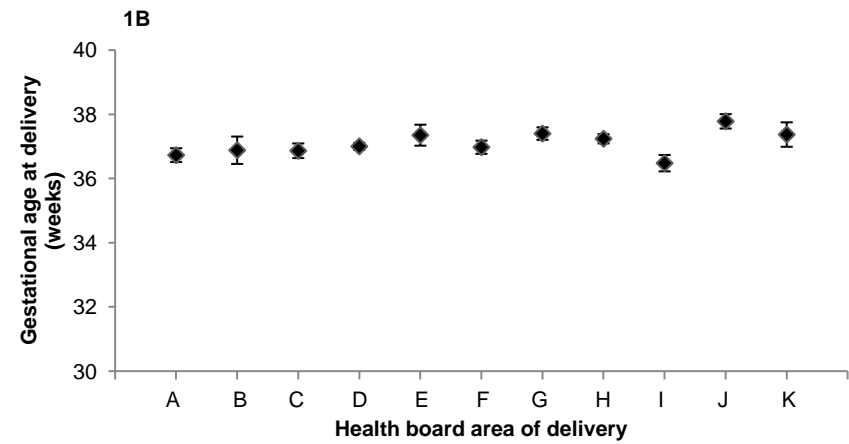

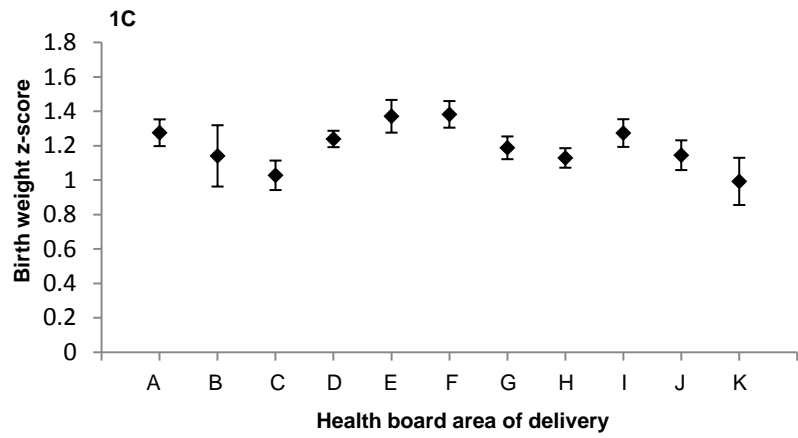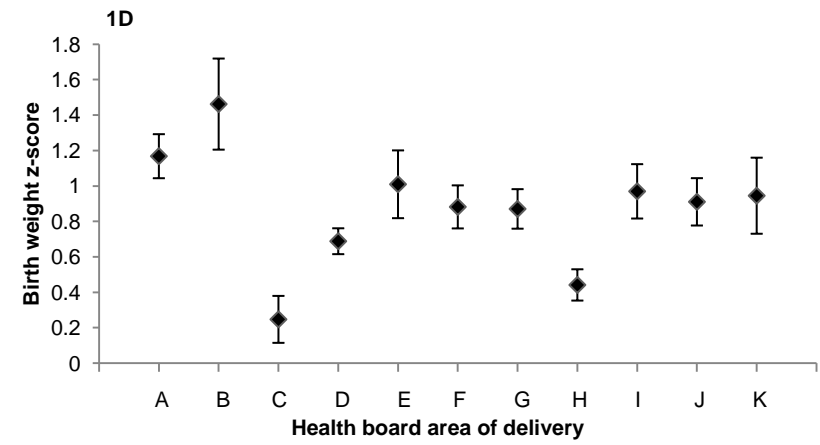

Supplement: MOESM1 [file 17017948]
